# Supplementary material for: Synthesis of two copper clusters and their catalysis towards the oxidation of benzene into phenol
Source: Royal Society of Chemistry journal article supplement (doi:10.1039/c4ra12832j), 2014-11-11
Supplement: c4ra12832j1.pdf [file c4ra12832j1.pdf]

## Electronic Supplementary Information

Synthesis of two copper clusters and their catalysis towards the oxidation of benzene into phenol

IR and UV–vis spectra for clusters **1** and **2**

In IR spectra of clusters **1** and **2**, the peaks at about 1607, 1489 and 1442  $\text{cm}^{-1}$  are belonged to pyridinyl and phenol rings vibrations. The peak at 625  $\text{cm}^{-1}$  is ascribed to Cl=O vibration of  $\text{ClO}_4^-$  groups. In MeCN solvent, the absorption bands in **H<sub>2</sub>L<sup>I</sup>** and **H<sub>2</sub>L<sup>II</sup>** at about 218 nm are the  $\pi$ – $\pi^*$  transition of pyridine and phenol groups; the other peaks at about 255 nm are ascribed to the n– $\pi^*$  transitions of ligands, Figure S1.

While for clusters **1** and **2** in MeCN, the similar absorption bands at about 225 and 255 nm are also ascribed to the  $\pi$ – $\pi^*$  and n– $\pi^*$  transition of ligands. There are new absorption bands appearing at about 299 nm in clusters **1** and **2**, which are belonged to ligand to metal charge transfer (LMCT) absorption band. The d–d transition of  $\text{Cu}^{2+}$  ions in both clusters at the long wave range is very weak.

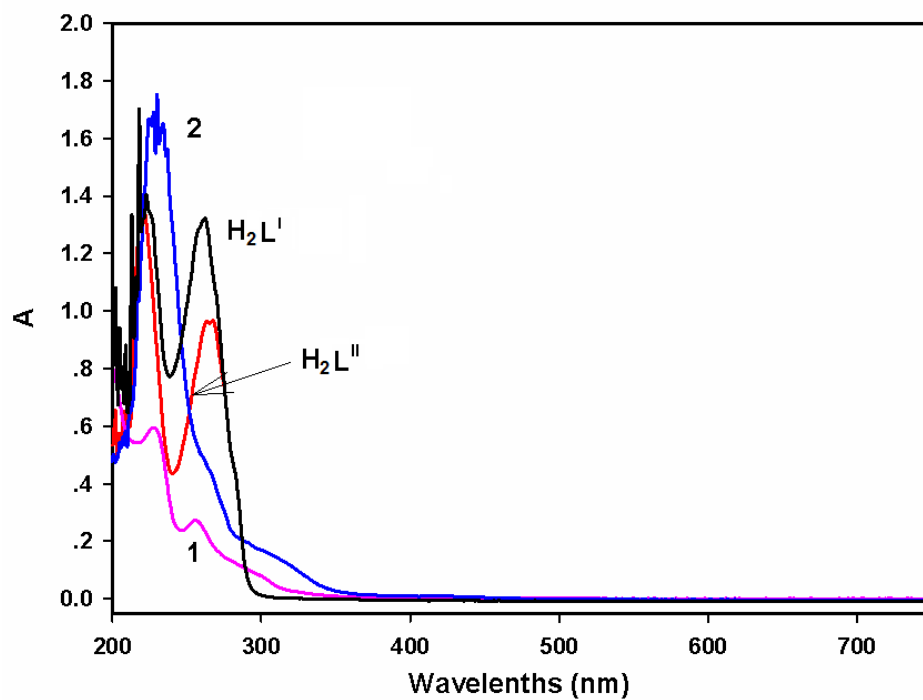

Figure S1 UV-vis absorption of ligands  $\text{H}_2\text{L}^{\text{I}}$  and  $\text{H}_2\text{L}^{\text{II}}$  and clusters **1–2** ( $1.0 \times 10^{-4}$  mol  $\text{L}^{-1}$  in MeCN).

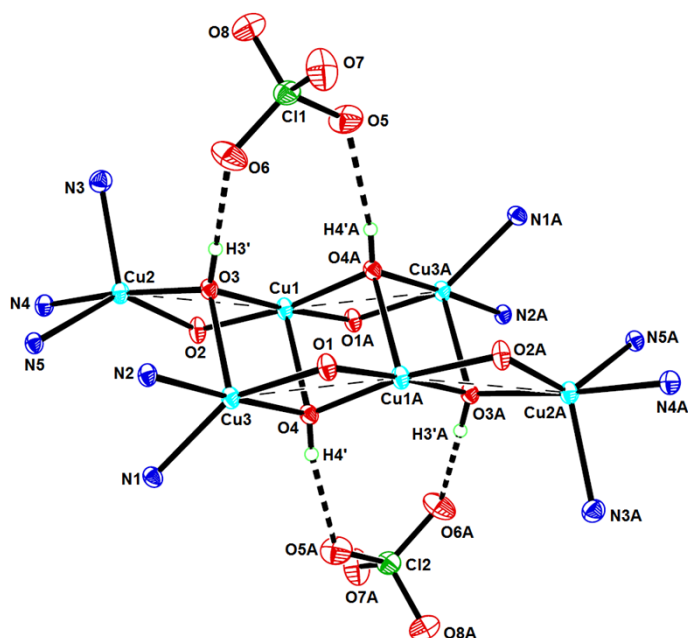

Figure S2 Six copper atoms connected with O atoms to form the two parallel three-site strings configuration, carbon atoms were omitted for clarity. Four hydrogen bonds

O–H···O connected a cation  $[\text{Cu}_6(\text{L}^{\text{I}})_2(\text{OH})_4]^{2+}$  with two  $\text{ClO}_4^-$  anions.

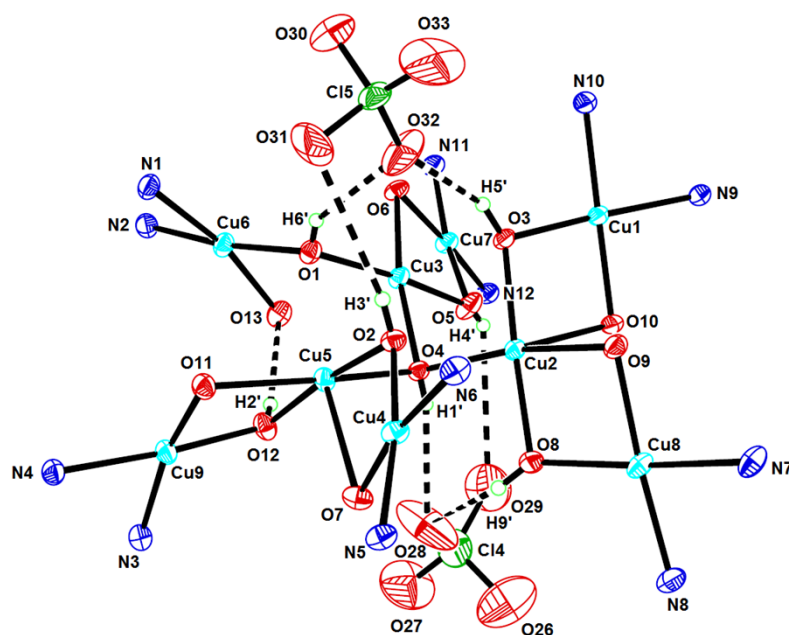

Figure S3 Six intermolecular hydrogen bonds O–H···O connected with a cation  $[\text{Cu}_9(\text{L}^{\text{II}})_3(\text{OH})_7]^{5+}$  and two  $\text{ClO}_4^-$  anions, and one intramolecular hydrogen bond O5–H2'···O13 within the nonanuclear core. Carbon atoms were omitted for clarity.

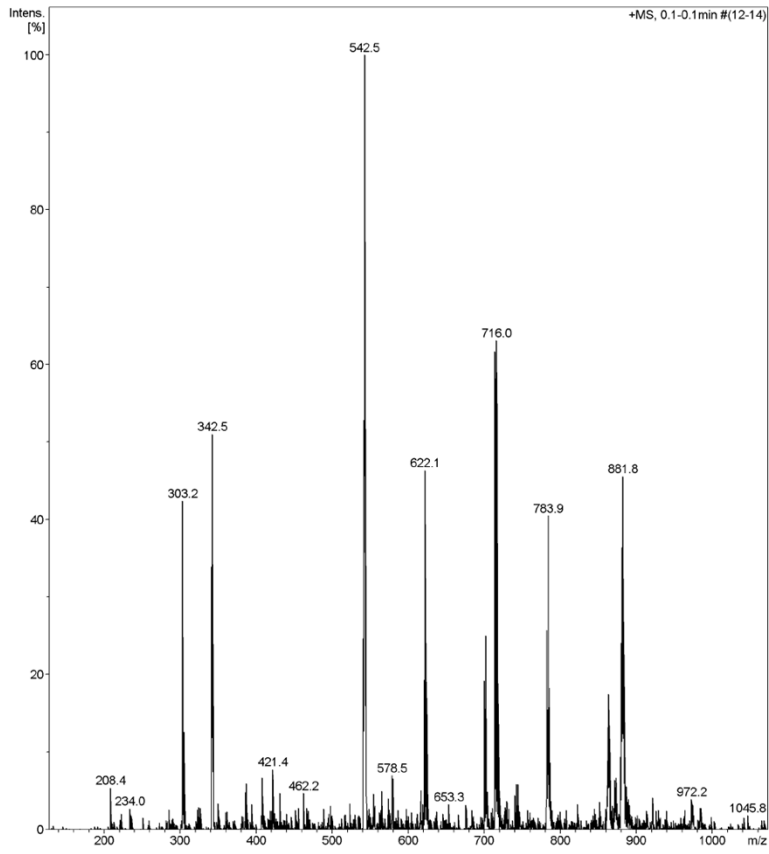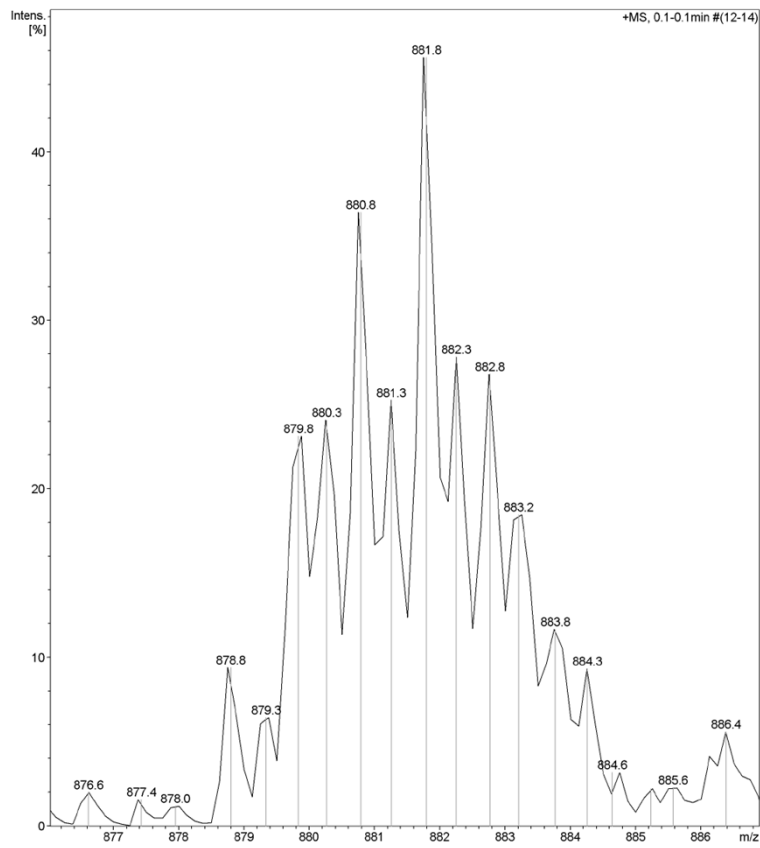

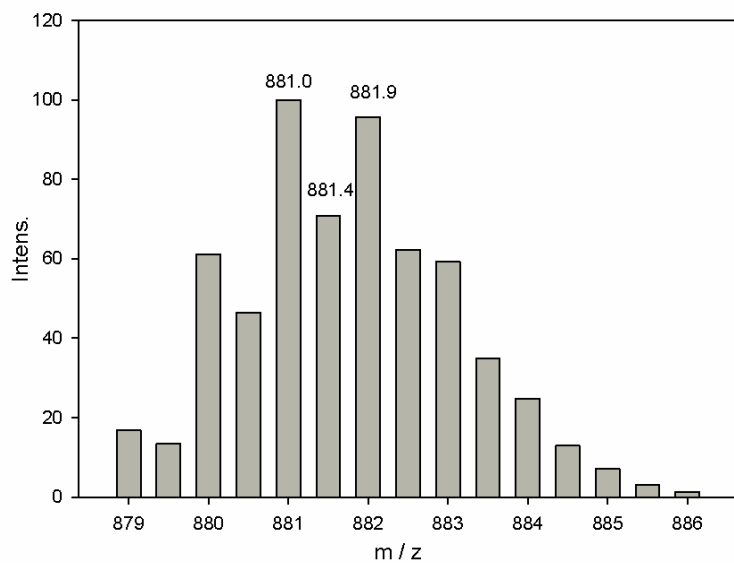

Figure S4 The positive-ion ESI mass spectrum of **1** (upper), and the observed (middle) and calculated (lower) isotopic patterns for  $(\mathbf{1} - 2\text{ClO}_4^-)^{2+}$  cation.

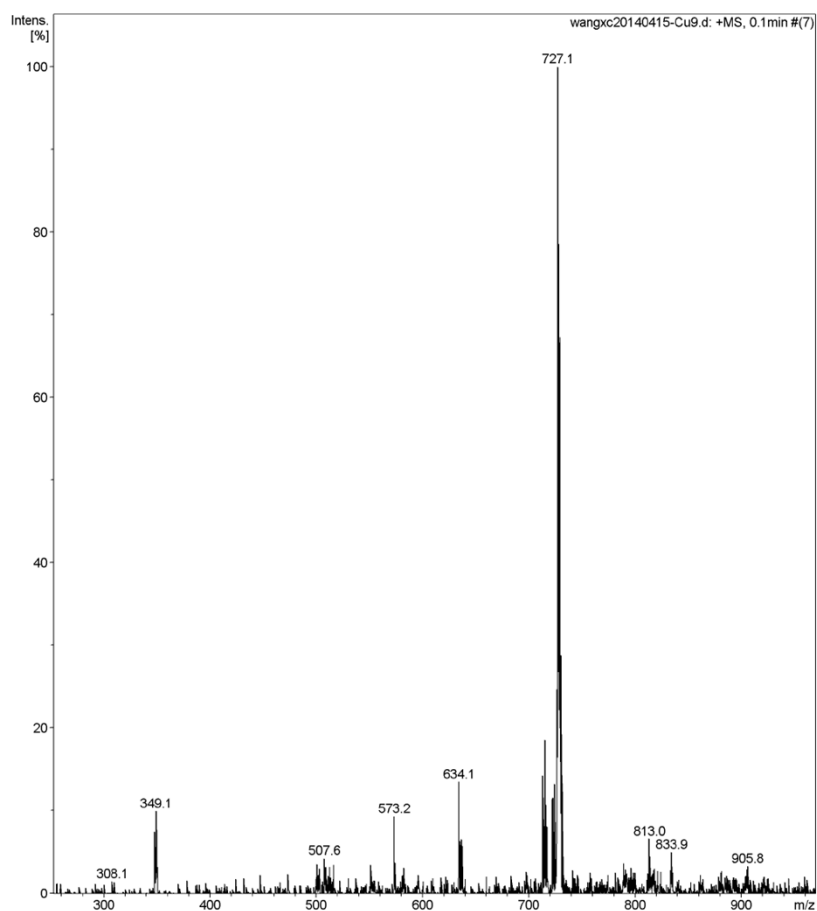

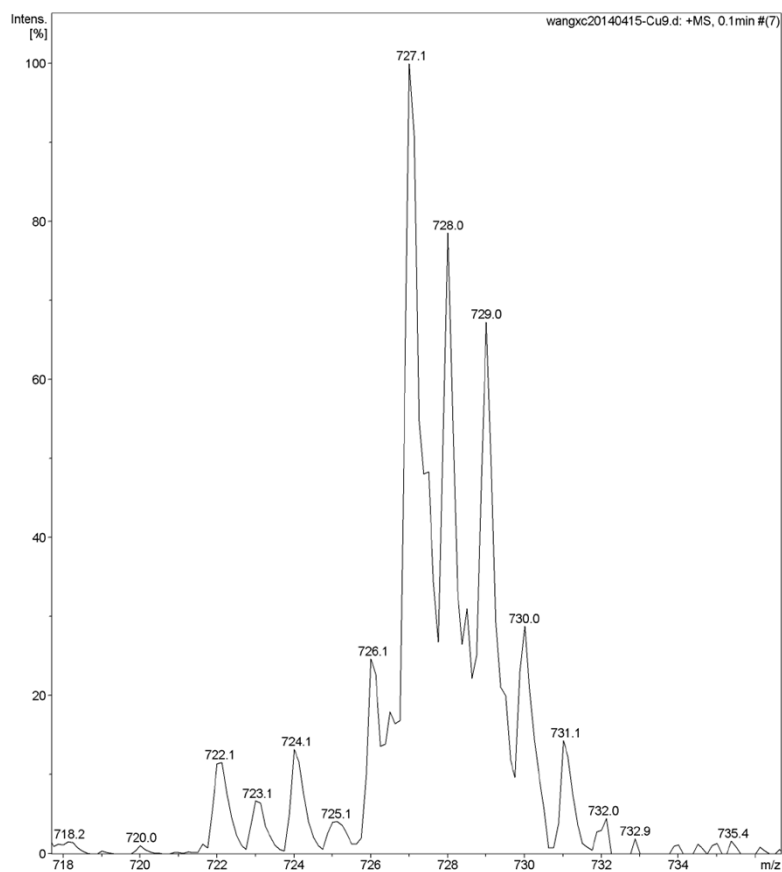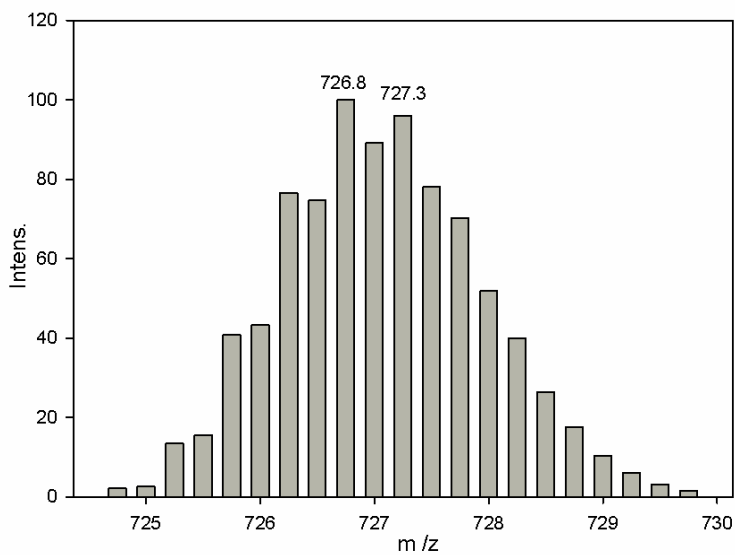

Figure S5 The positive-ion ESI mass spectrum of **2** (upper), and the observed (middle) and calculated (lower) isotopic patterns for  $(\mathbf{2} + 4\text{H}^+)^{4+}$  cation.

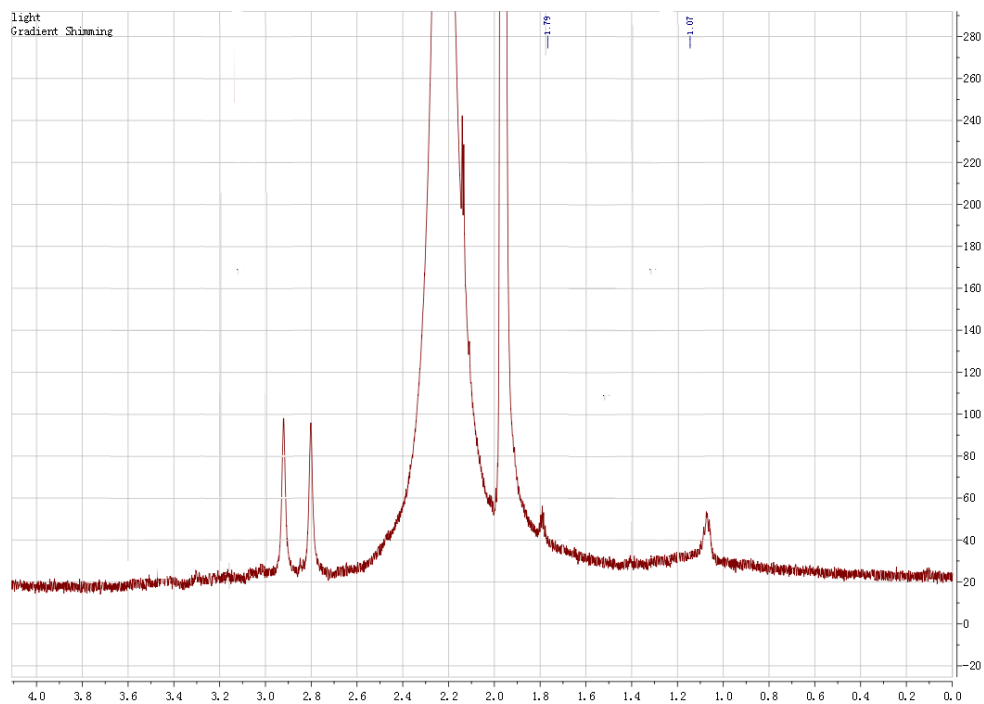

Figure S6 The  $^1\text{H}$  NMR spectrum of cluster **1** in  $\text{CD}_3\text{CN}$  showing the signals of two types of methyl protons.

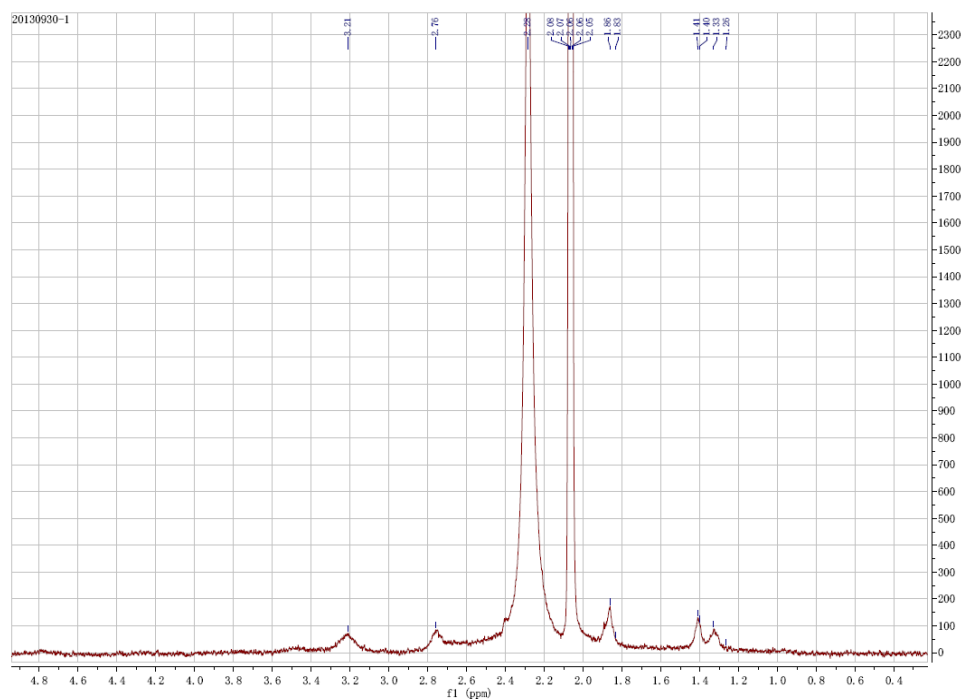

Figure S7 The  $^1\text{H}$  NMR spectrum of cluster **2** in  $\text{CD}_3\text{CN}$  showing the signals of three types of methyl protons.

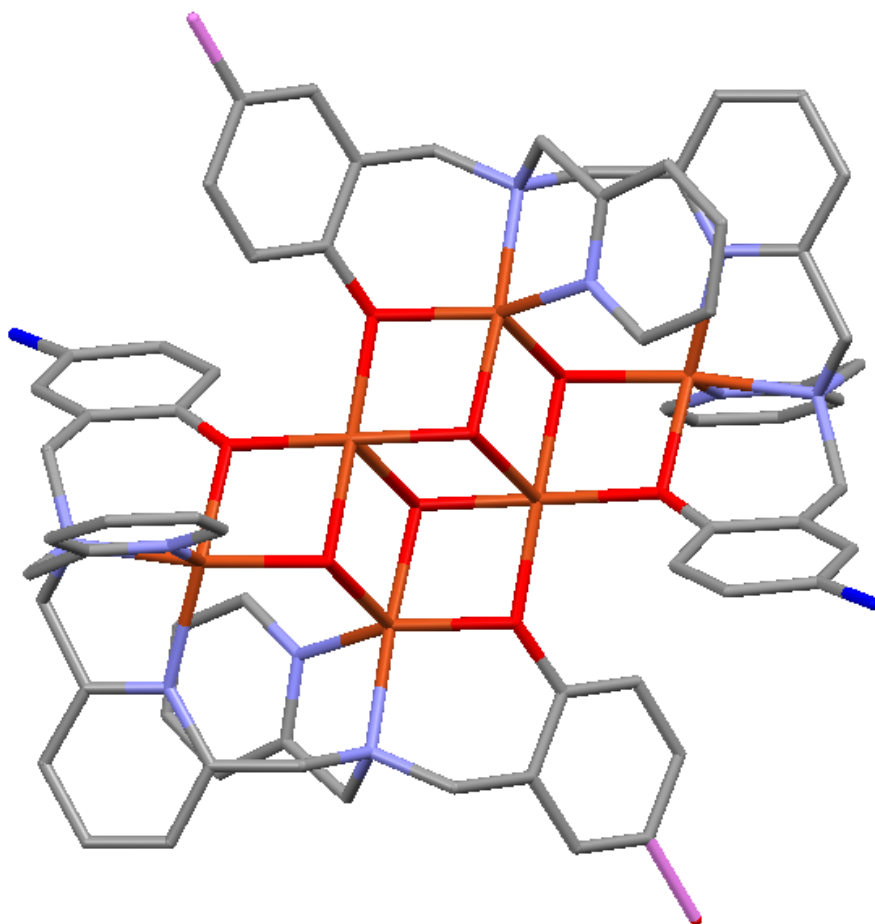

Figure S8 Two types of methyl groups in cluster **1** highlighted in blue and purple, respectively.



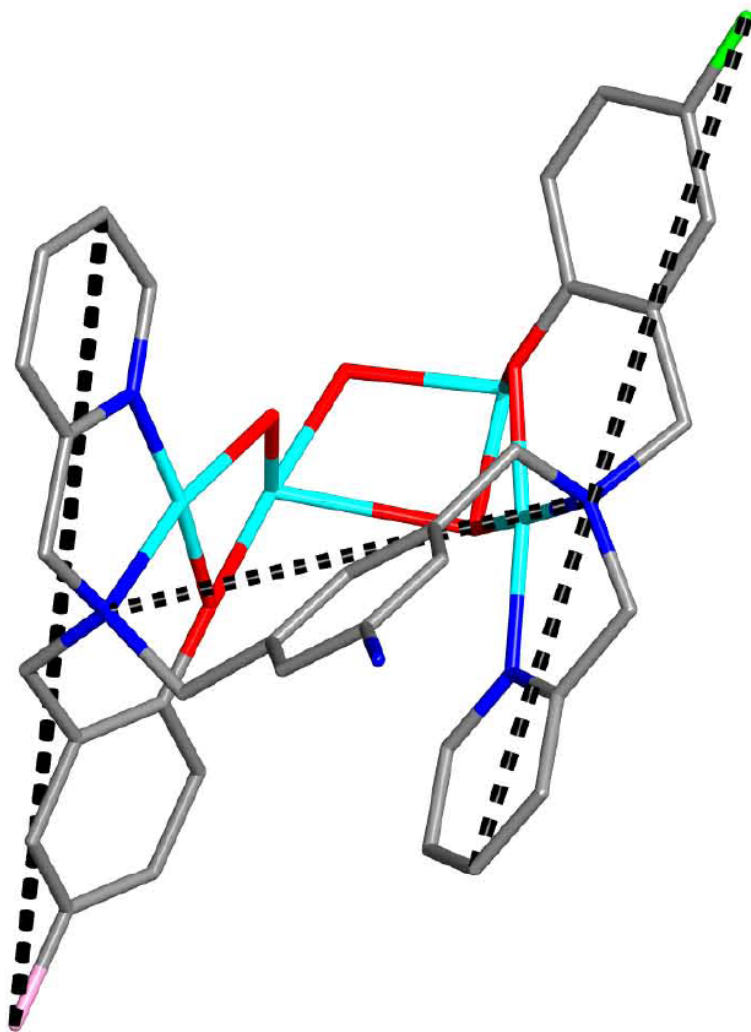

Figure S9 Three types of methyl groups in cluster **2** with methyl groups on the horizontal bar of the twisted “*H*” (blue) and the other two types of methyl groups with similar chemical environment on the vertical bars of the twisted “*H*” (green and purple, respectively). For clarity, only one third of  $[\text{Cu}_9(\text{L}^{\text{II}})_3(\text{OH})_7]$  core was shown.

Alternating current magnetic susceptibility measurements were performed on **1** and **2** in the 2–20 K range under a zero dc field. As shown in Figure S10, no frequency dependence of the ac susceptibility is observed in **1** and **2**. The magnetization versus field curves for **1** and **2** were measured at 2 K under a field of 70 kOe (Figure S11).

As the applied field increases, a rapid increase below about 40 kOe followed by a much slower increase led to a magnetization of 1.86 N $\beta$  for **1** and 2.85 N $\beta$  for cluster **2** at 70 kOe. No inflection point was found in the  $M$ - $H$  curves at 2 K.

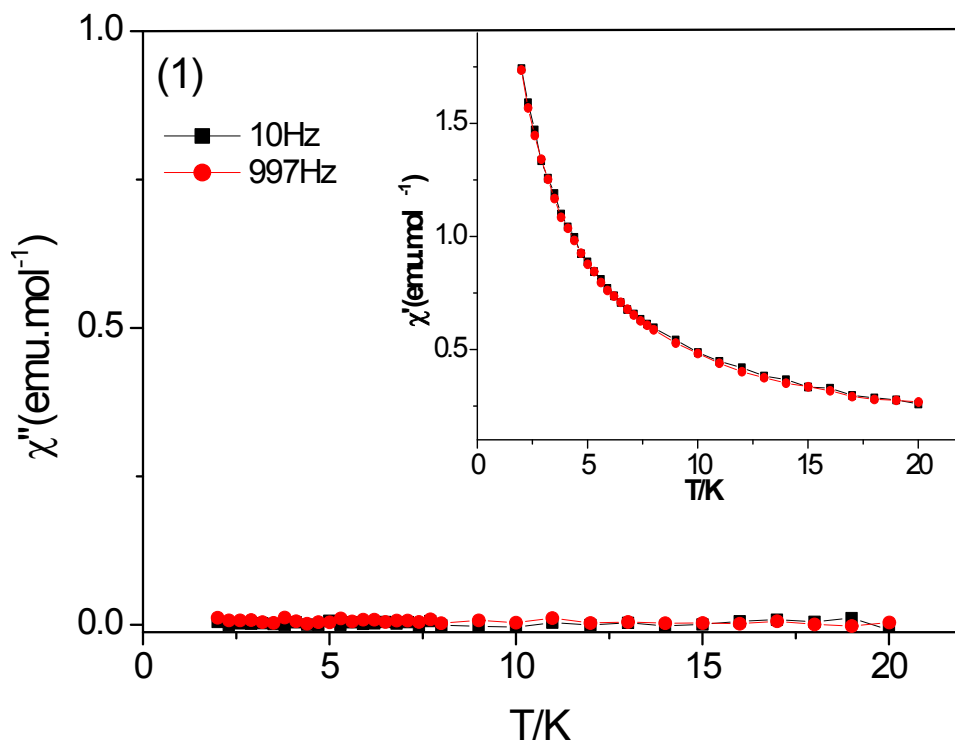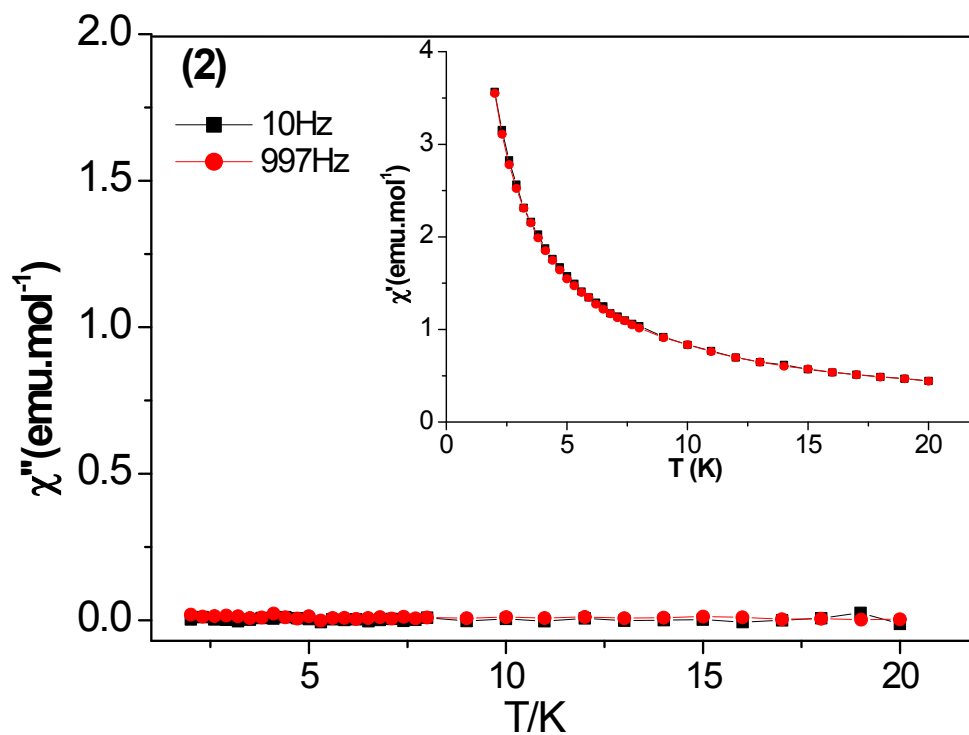

Figure S10 Temperature dependence of the in-phase and Out-of-phase dynamic susceptibility for clusters **1** (above) and **2** (below) under a zero dc field.

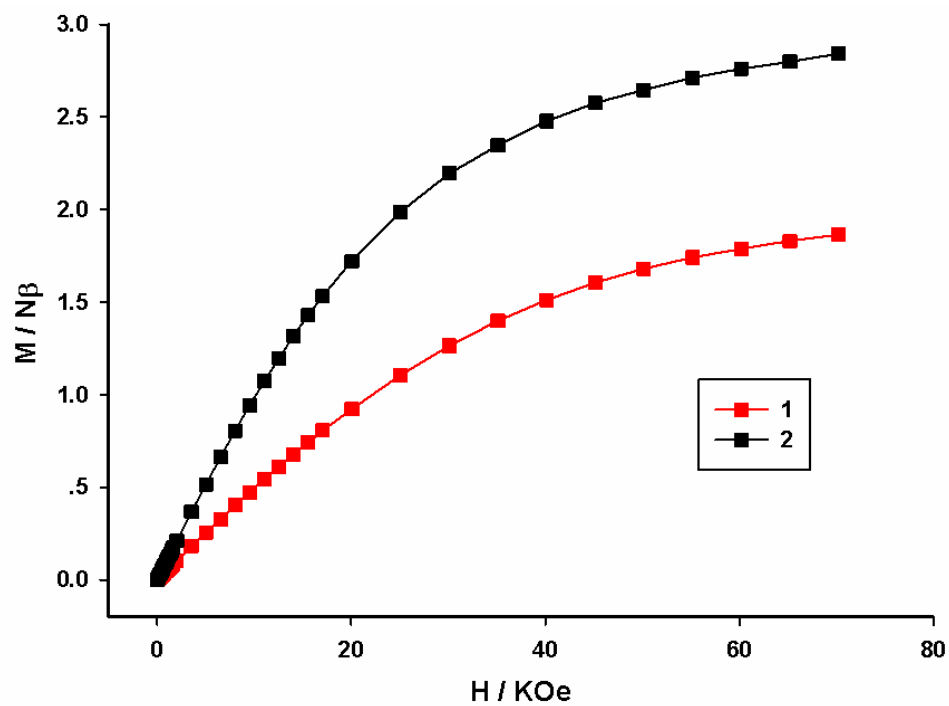

Figure S11 Magnetization data for clusters **1** and **2** at 2 K.

Table S1 Crystallographic data for clusters **1** and **2**.

| Complexes                                                  | <b>1</b>                                                                                                                                                                                       | <b>2</b>                                                                                                                                                                 |
|------------------------------------------------------------|------------------------------------------------------------------------------------------------------------------------------------------------------------------------------------------------|--------------------------------------------------------------------------------------------------------------------------------------------------------------------------|
| Chemical formula                                           | [C <sub>70</sub> H <sub>74</sub> Cu <sub>6</sub> N <sub>10</sub> O <sub>8</sub> ](ClO <sub>4</sub> ) <sub>4</sub> ·3<br>(C <sub>4</sub> H <sub>10</sub> O)·2(C <sub>3</sub> H <sub>7</sub> NO) | [C <sub>111</sub> H <sub>121</sub> Cu <sub>9</sub> N <sub>12</sub> O <sub>13</sub> ](ClO <sub>4</sub> ) <sub>5</sub><br>·0.25(CH <sub>3</sub> OH)·1.25(H <sub>2</sub> O) |
| Fw                                                         | 2331.04                                                                                                                                                                                        | 2926.82                                                                                                                                                                  |
| Crystal system                                             | Triclinic                                                                                                                                                                                      | Monoclinic                                                                                                                                                               |
| Space group                                                | P-1                                                                                                                                                                                            | P21/c                                                                                                                                                                    |
| <i>a</i> (Å)                                               | 12.193(8)                                                                                                                                                                                      | 18.9914(16)                                                                                                                                                              |
| <i>b</i> (Å)                                               | 13.320(9)                                                                                                                                                                                      | 21.3495(18)                                                                                                                                                              |
| <i>c</i> (Å)                                               | 19.035(17)                                                                                                                                                                                     | 33.231(3)                                                                                                                                                                |
| $\alpha$ (°)                                               | 107.282(12)                                                                                                                                                                                    | 90                                                                                                                                                                       |
| $\beta$ (°)                                                | 96.731(11)                                                                                                                                                                                     | 103.9630(10)                                                                                                                                                             |
| $\gamma$ (°)                                               | 107.393(8)                                                                                                                                                                                     | 90                                                                                                                                                                       |
| <i>V</i> (Å <sup>3</sup> )                                 | 2744(4)                                                                                                                                                                                        | 13075.7(19)                                                                                                                                                              |
| <i>Z</i>                                                   | 1                                                                                                                                                                                              | 4                                                                                                                                                                        |
| <i>D</i> <sub>calc</sub> (g·cm <sup>-3</sup> )             | 1.411                                                                                                                                                                                          | 1.487                                                                                                                                                                    |
| <i>F</i> (000)                                             | 1204                                                                                                                                                                                           | 5978                                                                                                                                                                     |
| $\mu$ (Mo K $\alpha$ , mm <sup>-1</sup> )                  | 1.314                                                                                                                                                                                          | 1.613                                                                                                                                                                    |
| Total no. of reflns.                                       | 13118                                                                                                                                                                                          | 95469                                                                                                                                                                    |
| $\theta_{\max}$                                            | 25                                                                                                                                                                                             | 25                                                                                                                                                                       |
| No. of unique reflns.                                      | 8942 [ <i>R</i> ( <sub>int</sub> ) = 0.0503]                                                                                                                                                   | 22990 [ <i>R</i> ( <sub>int</sub> ) = 0.0632]                                                                                                                            |
| No. of observed reflns                                     | 5708                                                                                                                                                                                           | 14195                                                                                                                                                                    |
| No. of variables                                           | 702                                                                                                                                                                                            | 1683                                                                                                                                                                     |
| <i>R</i> <sub>1</sub> , <i>wR</i> <sub>2</sub> (obsd data) | 0.0591, 0.1549                                                                                                                                                                                 | 0.0530, 0.1536                                                                                                                                                           |
| <i>R</i> <sub>1</sub> , <i>wR</i> <sub>2</sub> (all data)  | 0.1030, 0.1818                                                                                                                                                                                 | 0.1035, 0.1868                                                                                                                                                           |
| GOF, <i>S</i>                                              | 1.034                                                                                                                                                                                          | 1.086                                                                                                                                                                    |
| Max./min. peak (e. Å <sup>-3</sup> )                       | 0.670, -0.627                                                                                                                                                                                  | 0.934, -0.578                                                                                                                                                            |

Table S2 Conductivity of complexes with different types at 10<sup>-3</sup> mol/L in MeCN.

| Complexes                                                                           | Electrolyte type | Conductivity ( $\mu\text{s}/\text{cm}$ ) | The expected values <sup>[1]</sup> |
|-------------------------------------------------------------------------------------|------------------|------------------------------------------|------------------------------------|
| $[\text{Fe}(\text{L}^{\text{I}})](\text{ClO}_4)$                                    | 1:1              | 130                                      | 92-199                             |
| $[\text{Ni}(\text{HL}^{\text{I}})](\text{BPh}_4)$                                   | 1:1              | 90                                       | 92-199,                            |
| $[\text{Cu}(\text{H}_2\text{L}^{\text{I}})](\text{Cl})(\text{PF}_6)$                | 2:1              | 200                                      | 220-300                            |
| $[\text{Cu}_6(\text{L}^{\text{I}})_2(\text{OH})_4](\text{ClO}_4)_4$ ( <b>1</b> )    | 4:1              | 390                                      | 500(?)                             |
| $[(\text{Cu}_9(\text{L}^{\text{II}})_3(\text{OH})_7)](\text{ClO}_4)_5$ ( <b>2</b> ) | 5:1              | 480                                      | -                                  |

[1] GEARY, W. J., *Coordination Chemistry Reviews* **1971**, 7, 81-122.
